# Supplementary material
Source: MDPI journal article supplement (https://www.mdpi.com/2571-8789/4/3/48)
Supplement: s1 [file s1]

Figure S1

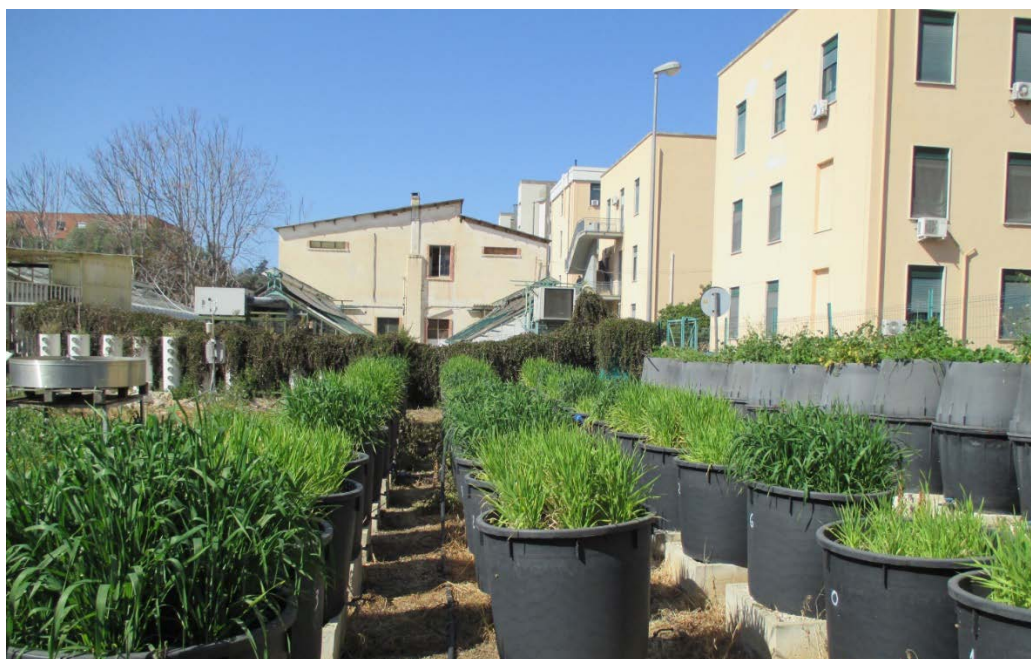

Overview of the trial during the barley growing season

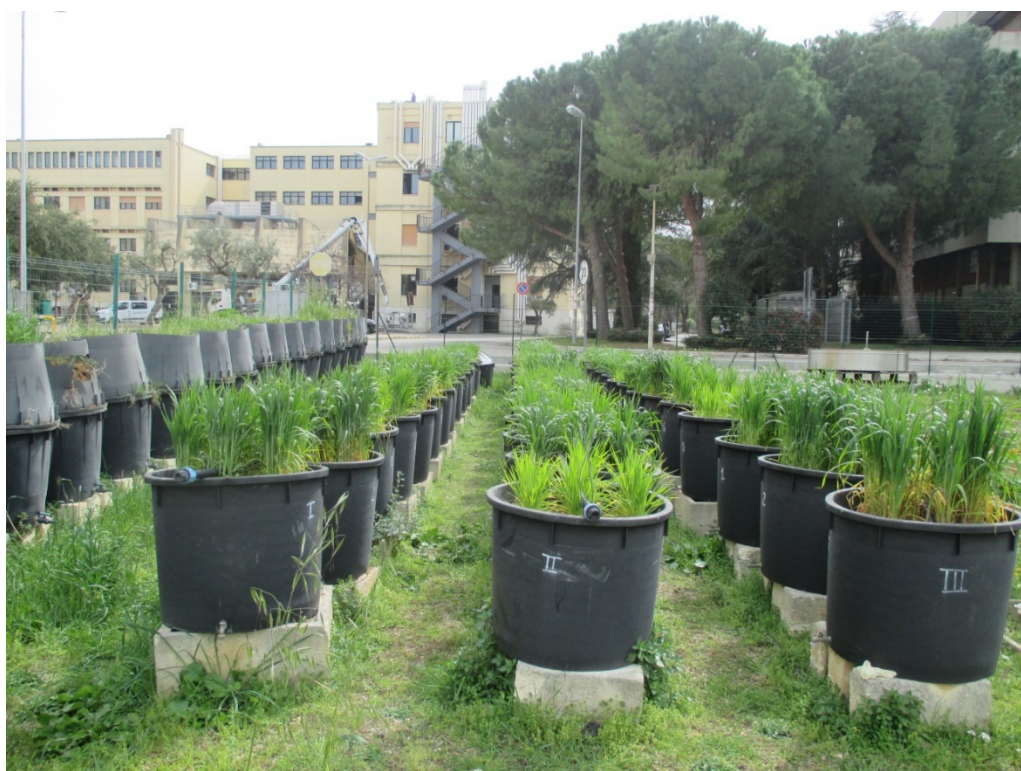

Overview of the trial during the wheat growing season
